# Supplementary material for: Exosomal miR-10a derived from amniotic fluid stem cells preserves ovarian follicles after chemotherapy
Source: PubMed Central journal article supplement (PMC4793229; doi:10.1038/srep23120), 2016-03-16
Supplement: srep23120-s1.pdf [file srep23120-s1.pdf]

## **Supplementary Information**

### **Exosomal miR-10a derived from amniotic fluid stem cells preserves ovarian follicles after chemotherapy**

Guan-Yu Xiao, Chun-Chun Cheng, Yih-Shien Chiang, Winston Teng-Kuei Cheng, I-Hsuan Liu, Shinn-Chih Wu

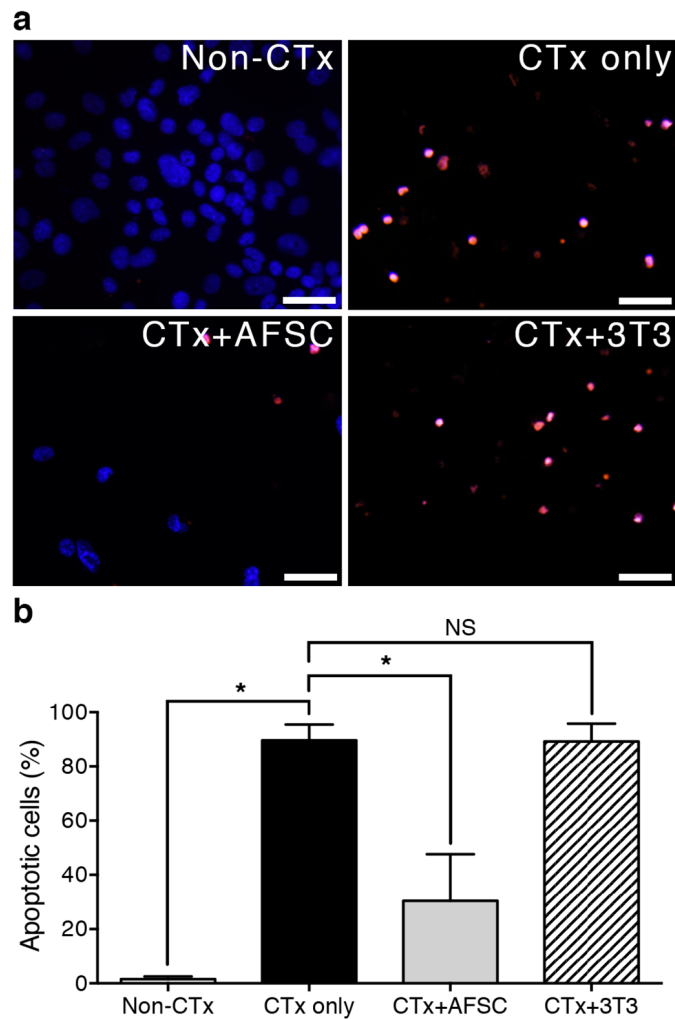

**Supplementary Figure 1. AFSCs reduce NM-damaged GCs apoptosis.** (a) The TUNEL staining images of following groups, GCs cultured without any treatment for 72 hours (Non-CTx). GCs with NM treatment for 24 hours, then removing NM and cultured for another 48 hours (CTx only). After NM treatment for 24 hours, GCs were further transwell co-cultured either with AFSCs (CTx+AFSC) or with NIH-3T3 (CTx+3T3) for another 48 hours. Nucleus was stained by DAPI (blue) while TUNEL positive cells showed as red. Scale bars, 25  $\mu$ m. (b) The apoptotic cells were counted by TUNEL-positive cells in each group. The NM-induced GCs apoptosis was significantly reduced in the presence of AFSCs, compared to other groups. Error bars represent s.e.m.  $n=3$ . \* $P < 0.05$ , NS, not significant; unpaired  $t$  test.

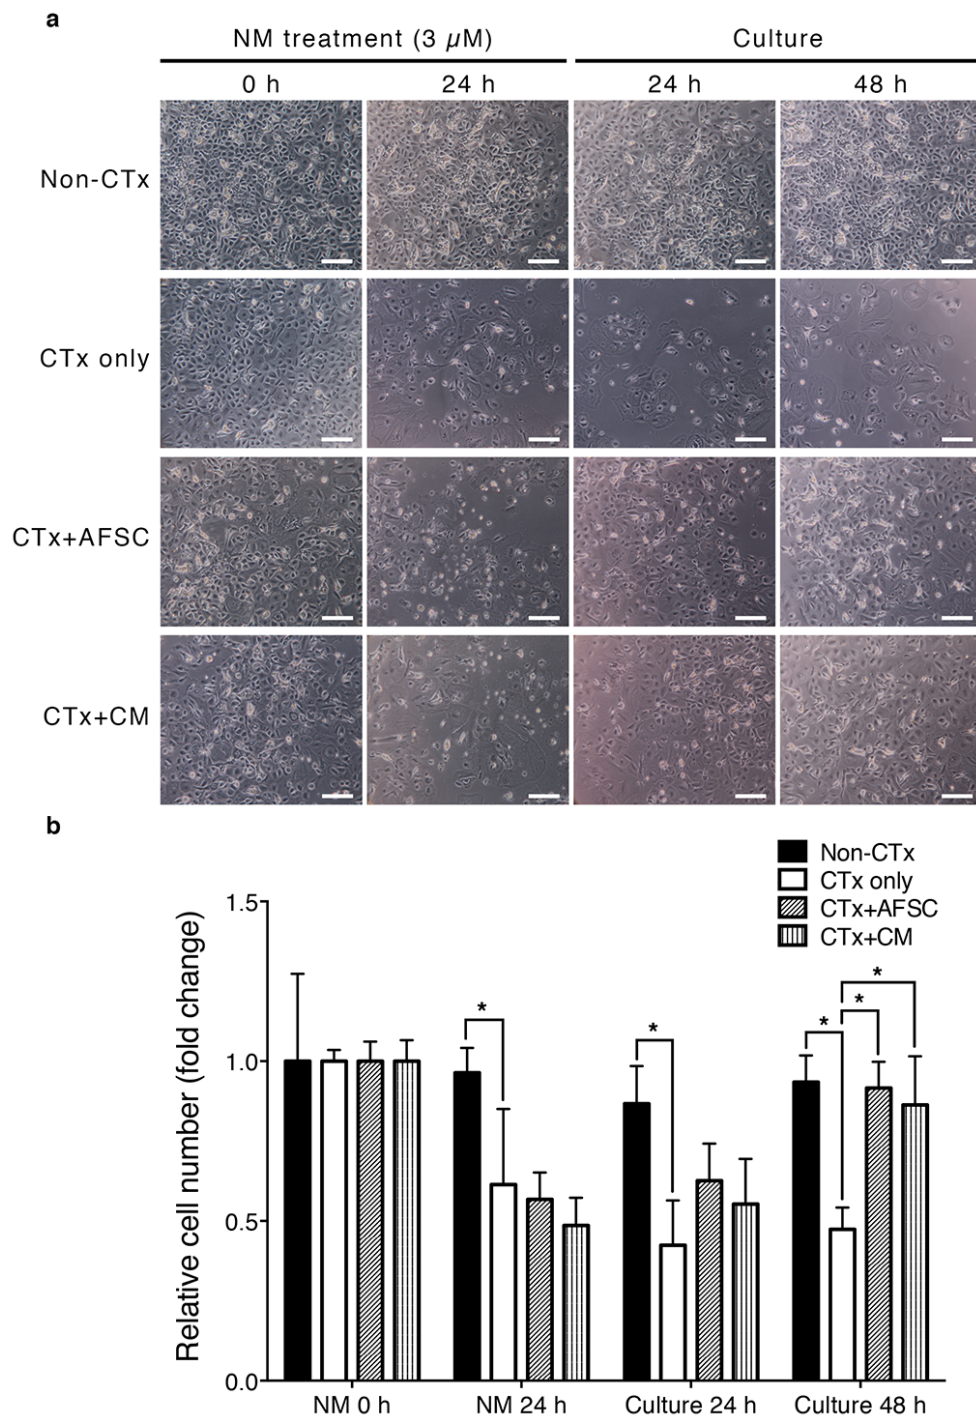

**Supplementary Figure 2. AFSCs sustain the viability of NM-damaged GCs via the secretory effect.** (a) The phase-contrast images of GCs that were followed NM treatment for 24 hours, then removing of NM, and without co-cultured (CTx only) or co-culture with either AFSCs (CTx-AFSC) or CM from AFSCs (CTx-CM) for 24 and 48 hours, except for Non-CTx group. Non-CTx group indicates GCs without NM treatment and without performing co-culture. Scale bars, 100  $\mu$ m. (b) The relative cell number (fold change) in each group at different time points. Error bars represent s.e.m.  $n=3$ .  $*P < 0.05$ ; unpaired  $t$  test.

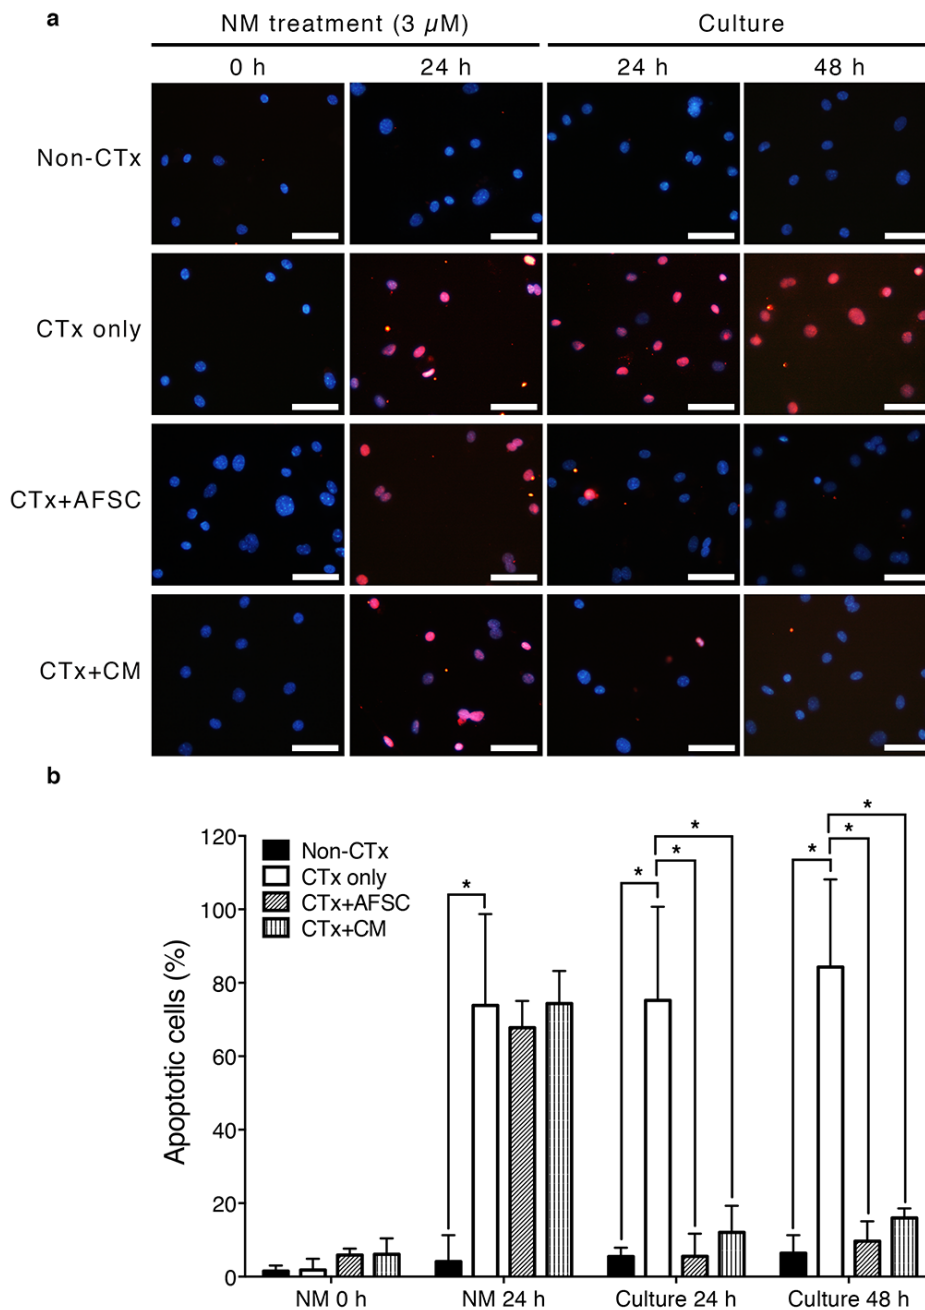

**Supplementary Figure 3. AFSCs protect against apoptosis in NM-damaged GCs via the secretory effect.** (a) The image of TUNEL assay of GCs that were followed NM treatment for 24 hours, then removing of NM, and without co-cultured (CTx only) or co-cultured with either AFSCs (CTx-AFSC) or CM from AFSCs (CTx-CM) for 24 and 48 hours, except for Non-CTx group. Non-CTx group indicates GCs without NM treatment and without performing co-culture. Nucleus was stained by DAPI (blue). TUNEL positive cells (red) indicated the cell undergoing apoptosis. Scale bars, 30  $\mu$ m. (b) The percentage of apoptotic cells in each group at different time points. Error bars represent s.e.m.  $n=3$ . \* $P < 0.05$ ; unpaired  $t$  test.

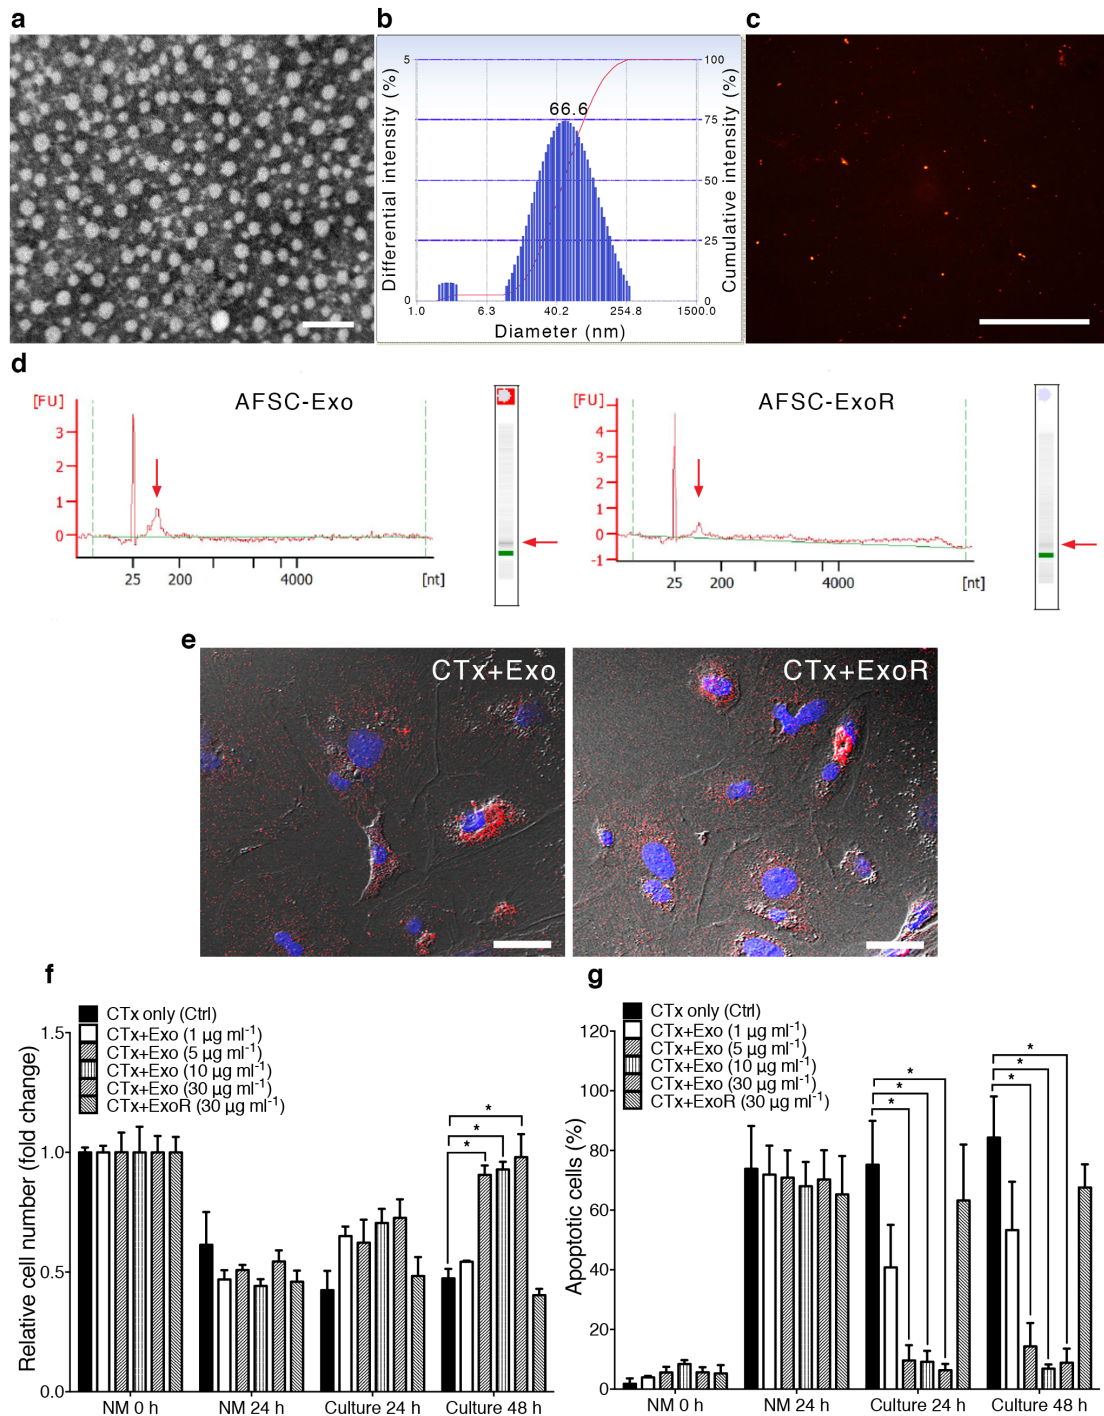

**Supplementary Figure 4. Anti-apoptotic effects of AFSC-derived exosomes.** (a)

The representative transmission electron micrograph of AFSC-derived exosomes. Scale bar, 100 nm. (b) The size distribution of AFSC-derived exosomes were determined using Nano C Analyzer. (c) The representative image of PKH26-labeled AFSC-derived exosomes (red) obtained by fluorescence microscopy. Scale bar, 50  $\mu$ m. (d) The analysis of RNA from AFSC-derived exosomes (AFSC-Exo) and

AFSC-derived exosomes pre-treated with RNase (AFSC-ExoR) by Bioanalyzer. Arrows indicate the RNA content. **(e)** After 3 hours of culture, AFSC-Exo and AFSC-ExoR (both in  $30 \mu\text{g ml}^{-1}$  of exosomes proteins) were incorporated by damaged GCs and distributed in the cytoplasm (red). Nucleus was stained by DAPI (blue). Scale bars,  $40 \mu\text{m}$ . **(f)** The relative cell number (fold change) of damaged GCs cultured with various doses of AFSC-Exo or AFSC-ExoR compared to the CTx only (Ctrl). Error bars represent s.e.m.  $n=3$ .  $*P < 0.05$ ; unpaired  $t$  test. **(g)** The percentage of apoptotic cells of damaged GCs cultured with various doses of AFSC-Exo or AFSC-ExoR compared to the CTx only (Ctrl). Error bars represent s.e.m.  $n=3$ .  $*P < 0.05$ ; unpaired  $t$  test.

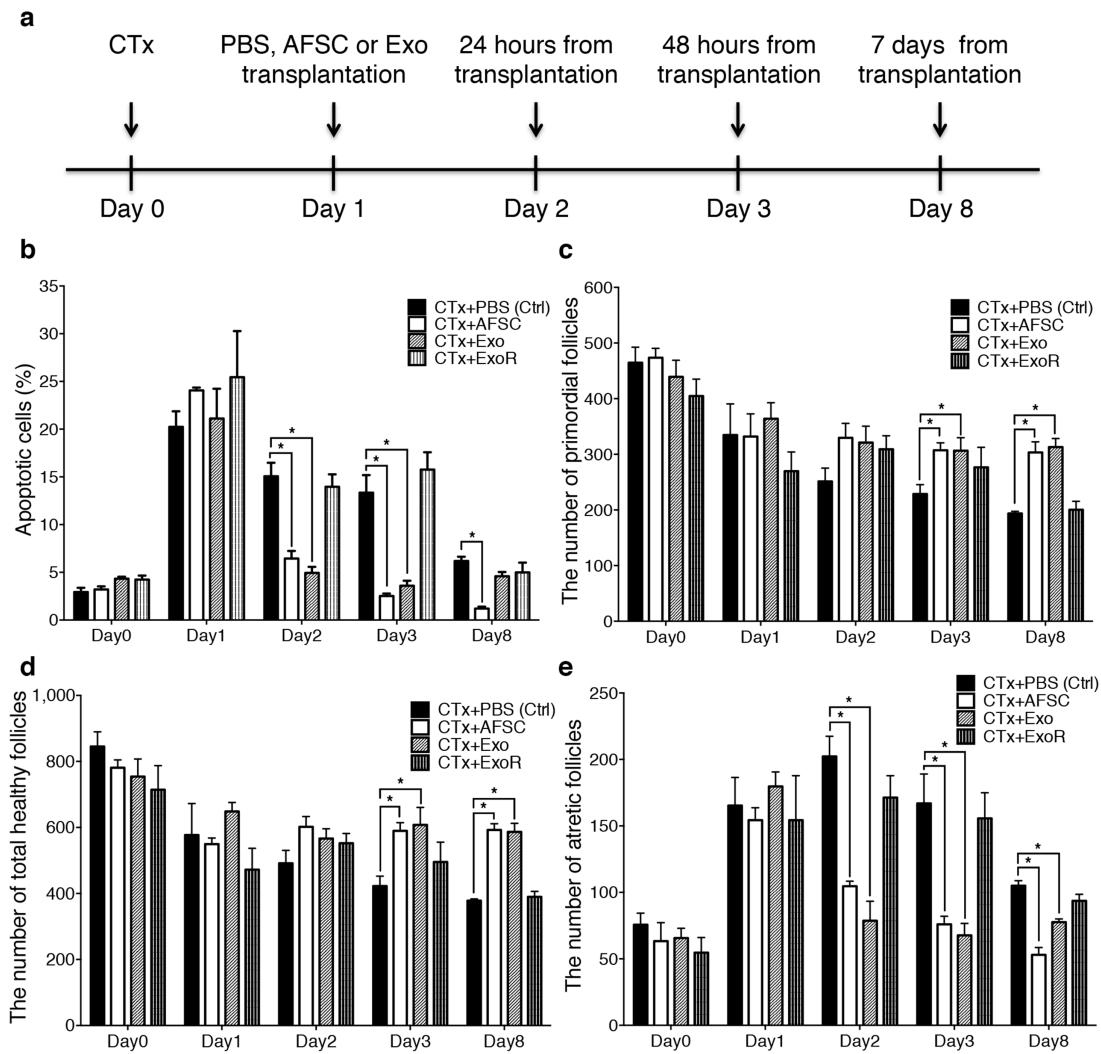

**Supplementary Figure 5. AFSC-derived exosomes exert therapeutic effects on ovaries in CTx-mice.** (a) The schematic diagram of the protocol of CTx administration and followed by treatment with PBS, AFSCs or AFSC-derived exosomes (Exo). (b) The percentage of apoptotic cells in ovaries of each group at different time points compared to the CTx+PBS (Ctrl). Exo, AFSC-derived exosomes; ExoR, AFSC-derived exosomes with RNase treatment. Error bars represent s.e.m.  $n=3$ .  $*P < 0.05$ ; unpaired  $t$  test. (c-e) The number of (c) primordial, (d) total healthy, and (e) atretic follicles in ovaries of each group at different time points compared to the CTx+PBS (Ctrl). Exo, AFSC-derived exosomes; ExoR, AFSC-derived exosomes with RNase treatment. Error bars represent s.e.m.  $n=3$ .  $*P < 0.05$ ; unpaired  $t$  test.

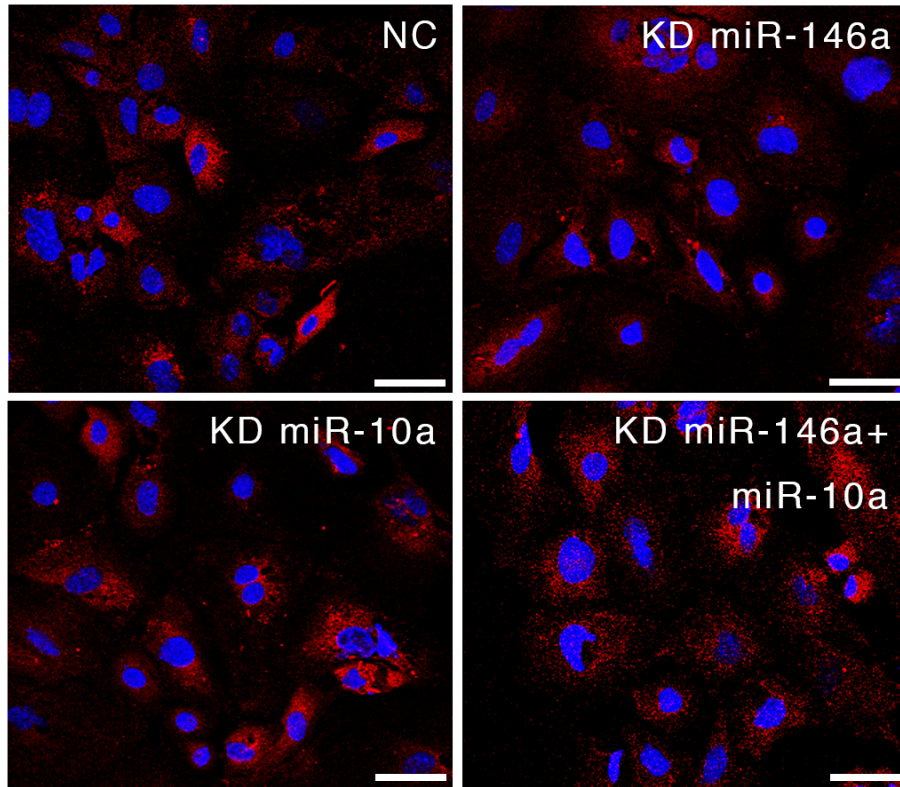

**Supplementary Figure 6. Exosomes were incorporated into damaged GCs.** After 3 hours of culture, damaged GCs incorporated exosomes derived from AFSCs transfected with inhibitor negative control (NC), miR-146a inhibitor (KD miR-146a), miR-10a inhibitors (KD miR-10a) or both inhibitors (KD miR-146a+miR-10a) into the cytoplasm. Exosomes were labeled by PKH26 (red). Nucleus was stained by DAPI (blue). Scale bars, 40  $\mu$ m.



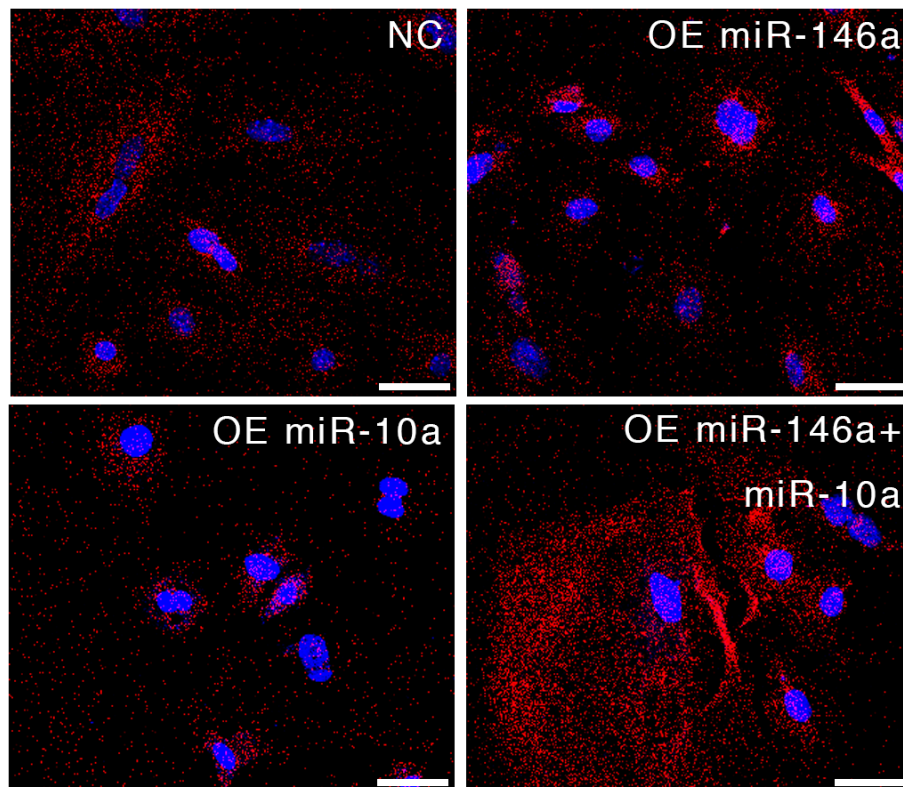

**Supplementary Figure 7. Liposomes were incorporated into damaged GCs.** After 3 hours of the culture, damaged GCs incorporated liposomes carrying negative control siRNAs (NC), miR-146a (OE miR-146a), miR-10a (OE miR-10a) or both miRNAs (OE miR-146a+miR-10a) into the cytoplasm. Liposomes were labeled by PKH26 (red). Nucleus was stained by DAPI (blue). Scale bars, 40  $\mu$ m.

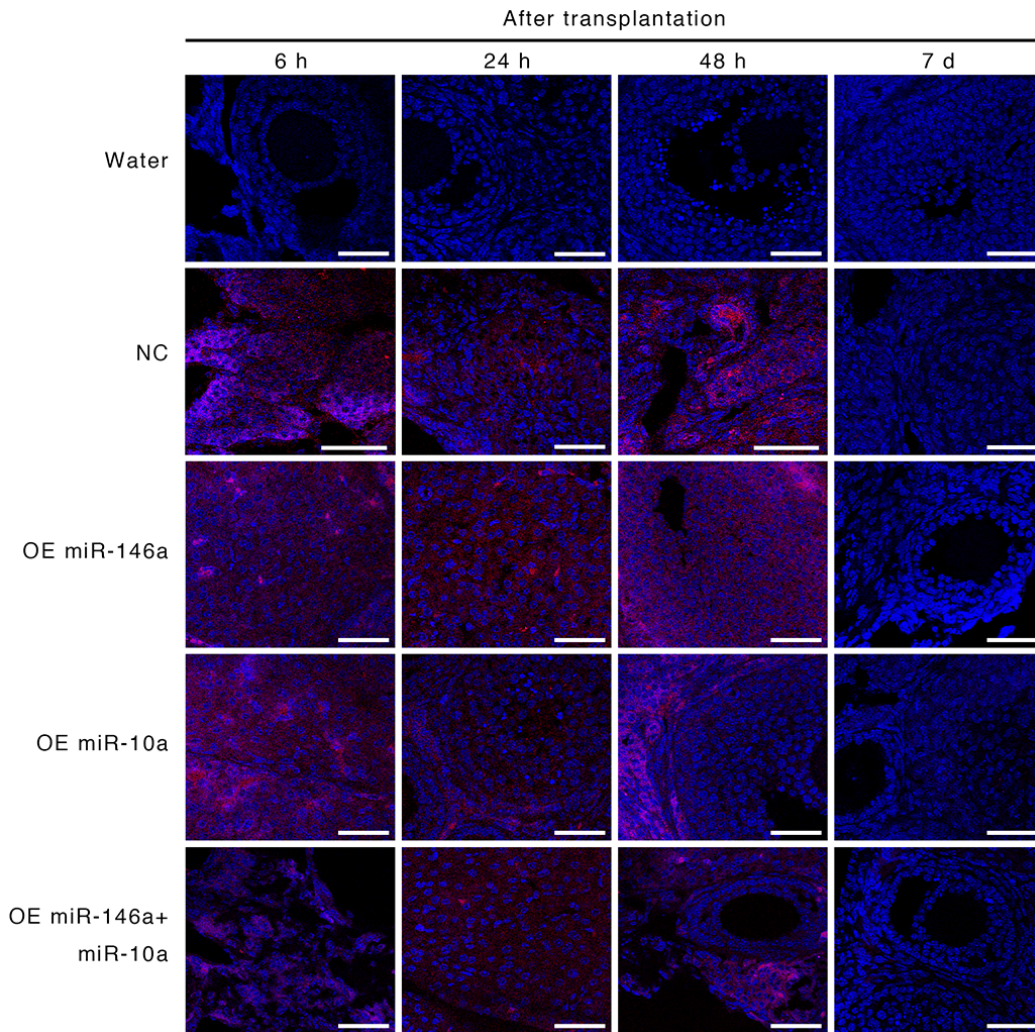

**Supplementary Figure 8. Liposomes were incorporated into ovarian cells in CTx-mice.** Representative images of ovarian sections of CTx-mice with only water injection, with the injection of liposomes carrying negative control siRNAs (NC), miR-146a (OE miR-146a), miR-10a (OE miR-10a) or both miRNAs (OE miR-146a+miR-10a) at different time points. Liposomes were labeled by PKH26 (red). Nucleus was stained by DAPI (blue). Scale bars, 50  $\mu$ m.

**Supplementary Table 1. A list of miRNAs increased in AFSC-derived exosomes.**

The miRNA expression level of AFSC-derived exosomes was compared with that of NIH 3T3-derived exosomes. The asterisk (\*) indicates that the miRNA relates to anti-apoptosis.

| <b>miRNAs</b>      | <b>Fold change</b> | <b>miRNAs</b>     | <b>Fold change</b> |
|--------------------|--------------------|-------------------|--------------------|
| *mmu-miR-146a-5p   | 287.20             | mmu-miR-181b-2-5p | 6.53               |
| *mmu-miR-10a-5p    | 54.96              | mmu-miR-532-5p    | 6.28               |
| mmu-miR-148a-3p    | 40.00              | mmu-miR-191-5p    | 6.06               |
| mmu-miR-145-5p     | 20.70              | mmu-miR-540-5p    | 5.29               |
| mmu-miR-434-5p     | 18.55              | mmu-miR-142-5p    | 5.26               |
| mmu-miR-138-1-3p   | 13.50              | mmu-miR-666-5p    | 5.09               |
| mmu-miR-3470b      | 13.00              | mmu-miR-152-5p    | 5.00               |
| mmu-miR-674-5p     | 12.00              | mmu-miR-16-1-3p   | 5.00               |
| mmu-miR-374-5p     | 11.00              | mmu-miR-378d      | 4.962              |
| mmu-miR-205-5p     | 10.00              | mmu-miR-16-2      | 4.94               |
| mmu-miR-154-5p     | 9.83               | mmu-miR-30d       | 4.734              |
| mmu-miR-136-5p     | 9.00               | mmu-miR-485       | 4.6                |
| mmu-miR-138-2-3p   | 9.00               | mmu-miR-15a       | 4.488              |
| mmu-miR-194-5p     | 9.00               | *mmu-miR-21a      | 4.484              |
| mmu-miR-382-5p     | 8.69               | mmu-miR-134       | 4.422              |
| mmu-miR-129-1-3p   | 8.50               | mmu-miR-181a-2    | 4.412              |
| mmu-miR-194-5p     | 8.00               | mmu-miR-1198      | 4.333              |
| mmu-miR-339-5p     | 8.00               | mmu-miR-181a-1    | 4.329              |
| mmu-miR-376a-5p    | 8.00               | mmu-miR-1943      | 4.2                |
| mmu-miR-5114       | 8.00               | mmu-miR-369       | 4.2                |
| mmu-miR-150-5p     | 7.39               | mmu-miR-122       | 4                  |
| mmu-miR-224-5p     | 7.00               | mmu-miR-1306      | 4                  |
| mmu-miR-296-5p     | 7.00               | mmu-miR-1843a     | 4                  |
| mmu-miR-99a-5p     | 7.00               | mmu-miR-221       | 4                  |
| mmu-miR-431-5p     | 6.88               | mmu-miR-222       | 4                  |
| *mmu-miR-181b-1-5p | 6.64               | mmu-miR-3473d     | 4                  |
| mmu-miR-486-3p     | 6.60               | mmu-miR-125b-1    | 3.962              |
| mmu-miR-486-5p     | 6.57               | mmu-miR-100       | 3.946              |

| <b>miRNAs</b>  | <b>Fold change</b> | <b>miRNAs</b>  | <b>Fold change</b> |
|----------------|--------------------|----------------|--------------------|
| mmu-miR-340    | 3.923              | mmu-miR-27a    | 2.5                |
| mmu-miR-3535   | 3.857              | mmu-miR-3057   | 2.5                |
| mmu-miR-484    | 3.83               | mmu-miR-34a    | 2.5                |
| mmu-miR-425    | 3.812              | mmu-miR-671    | 2.5                |
| mmu-miR-126a   | 3.693              | mmu-miR-22     | 2.469              |
| mmu-miR-127    | 3.667              | mmu-miR-32     | 2.4                |
| mmu-miR-331    | 3.667              | mmu-miR-30e    | 2.341              |
| mmu-miR-30a    | 3.618              | mmu-miR-26b    | 2.339              |
| mmu-miR-144    | 3.571              | mmu-miR-10b    | 2.274              |
| mmu-miR-215    | 3.5                | mmu-miR-28a    | 2.25               |
| mmu-miR-125b-2 | 3.333              | mmu-miR-20a    | 2.231              |
| *mmu-miR-125a  | 3.143              | mmu-miR-214    | 2.167              |
| mmu-miR-192    | 3.051              | mmu-miR-188    | 2.143              |
| *mmu-miR-17    | 3                  | mmu-miR-26a-2  | 2.032              |
| mmu-miR-204    | 3                  | mmu-miR-26a-1  | 2.023              |
| *mmu-miR-29b-1 | 3                  | mmu-miR-411    | 2.007              |
| mmu-miR-450a-2 | 3                  | mmu-miR-193b   | 2                  |
| mmu-miR-542    | 3                  | mmu-miR-1955   | 2                  |
| mmu-miR-673    | 3                  | mmu-miR-219a-1 | 2                  |
| mmu-miR-335    | 2.941              | mmu-miR-30b    | 2                  |
| mmu-miR-99b    | 2.75               | mmu-miR-324    | 2                  |
| mmu-miR-24-2   | 2.737              | mmu-miR-345    | 2                  |
| mmu-miR-337    | 2.667              | mmu-miR-3470a  | 2                  |
| mmu-miR-186    | 2.653              | mmu-miR-376b   | 2                  |
| mmu-miR-155    | 2.6                | mmu-miR-450a-1 | 2                  |
| mmu-miR-423    | 2.589              | mmu-miR-8095   | 2                  |
| mmu-miR-877    | 2.588              | mmu-miR-8097   | 2                  |
| mmu-miR-151    | 2.579              |                |                    |
| mmu-miR-181c   | 2.545              |                |                    |
| mmu-miR-93     | 2.526              |                |                    |

**Supplementary Table 2. A list of the primer sequences for qRT-PCR.**

| Target genes (murine)            | Forward Primer (5'-3') | Reverse Primer (5'-3') |
|----------------------------------|------------------------|------------------------|
| <i>Irak1</i>                     | CAGAGGTGGAACAGCTATCAAG | CATTGGGCAAGAAGCCATAAAC |
| <i>Traf6</i>                     | AGCTGTCCTCTGGCAAATATC  | GTTGGGCAGTCCAGATCATAA  |
| <i>Bcl2l11</i><br>( <i>Bim</i> ) | GAGCTGGGAGTCTTGTGTACTA | GCCCATATGCTGGGTGTATTT  |
| <i>Casp9</i>                     | CGACCTGACTGCCAAGAAA    | GAGAGGATGACCACCACAAAG  |
| <i>Gapdh</i>                     | CATGGCCTTCCGTGTTTCCT   | GCGGCACGTCAGATCCA      |
